# Supplementary material
Source: PubMed Central journal article supplement (PMC3436194)

# Supplement Fig. 1S

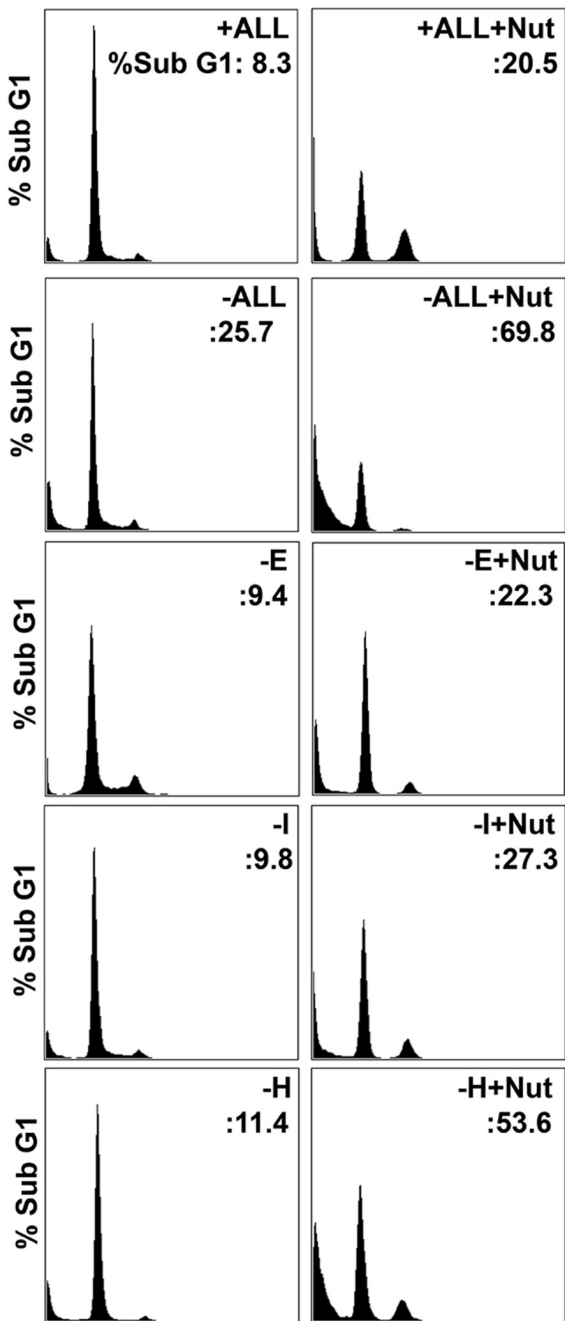

Supplement: supp_M112.393256_jbc.M112.393256-1.pdf [file supp_M112.393256_jbc.M112.393256-1.pdf]

# Supplement Fig 2S

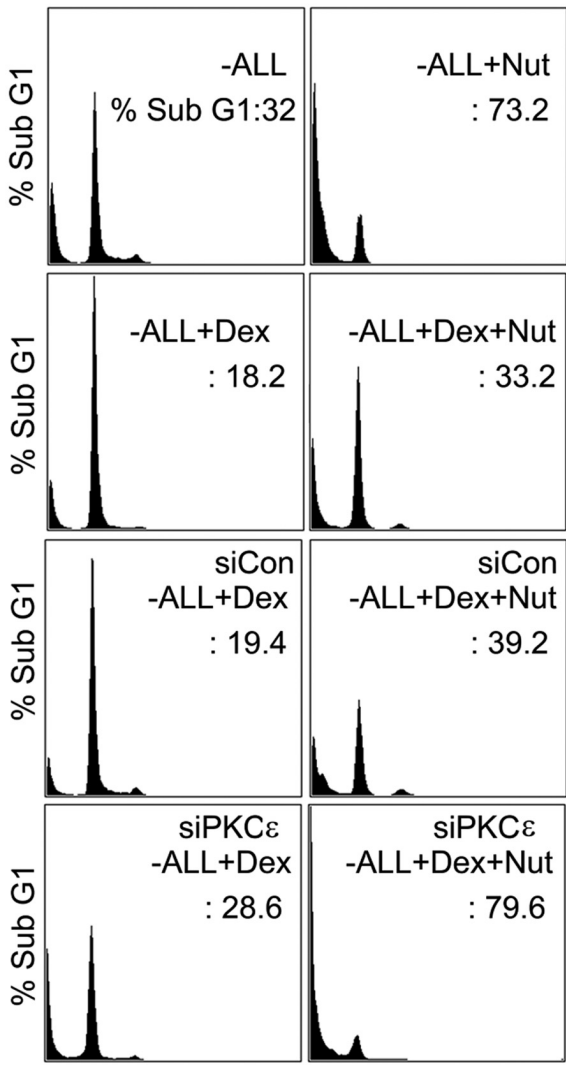

Supplement: supp_M112.393256_jbc.M112.393256-2.pdf [file supp_M112.393256_jbc.M112.393256-2.pdf]

**MCF10Amyc****Supplement Fig: 3S**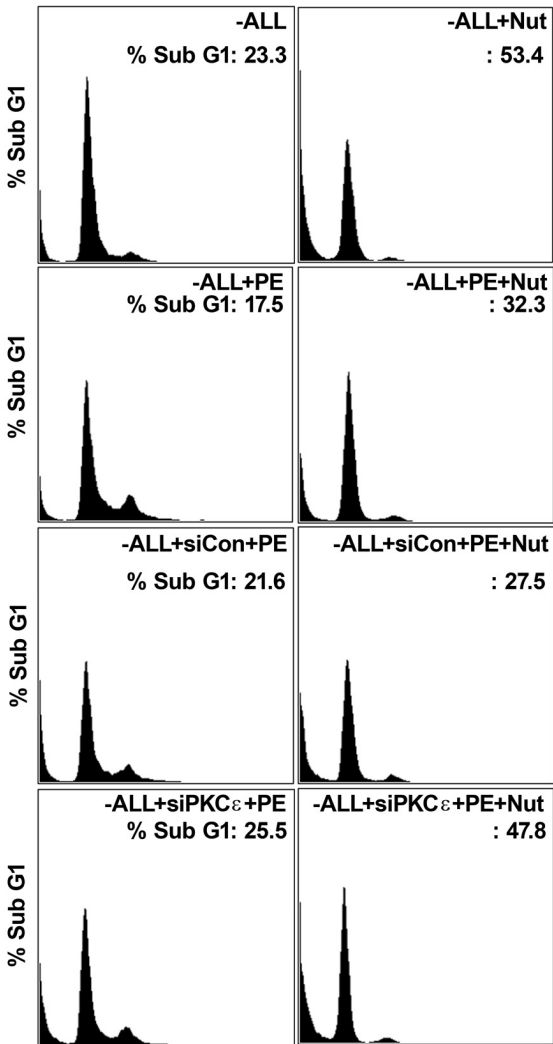

Supplement: supp_M112.393256_jbc.M112.393256-3.pdf [file supp_M112.393256_jbc.M112.393256-3.pdf]

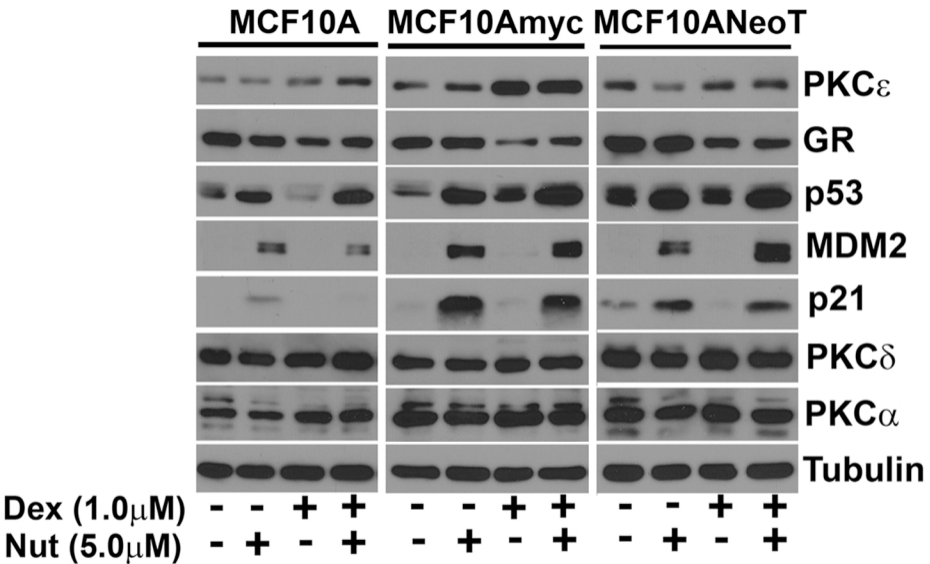

**Supplement Fig. 4S-A**

## A. MCF10A

## Supplement Fig. 4S-B

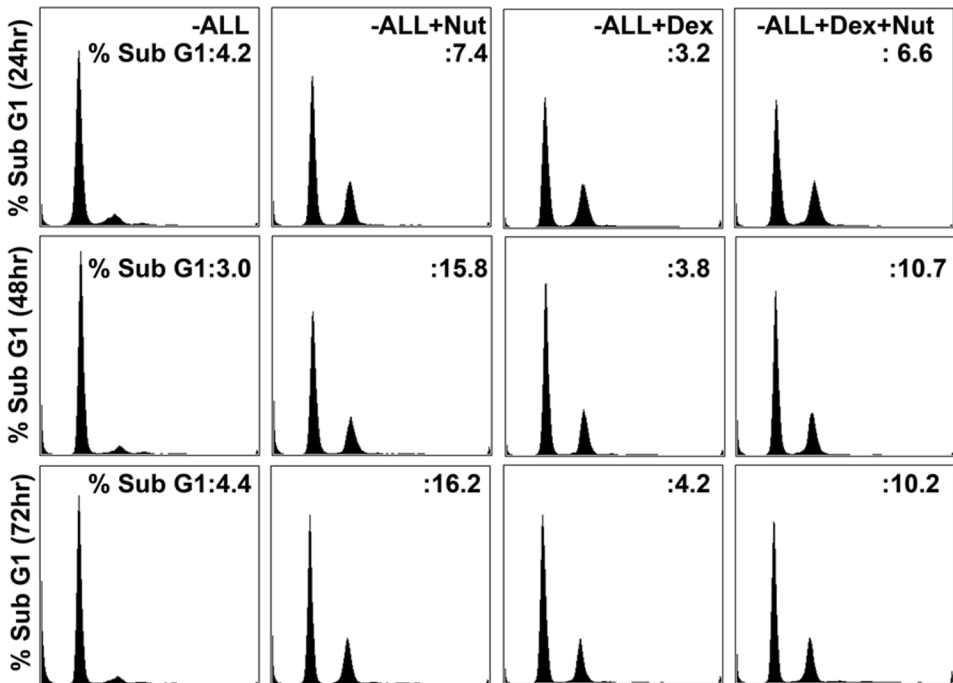

**B. MCF10Amyc****Supplement Fig. 4S-C**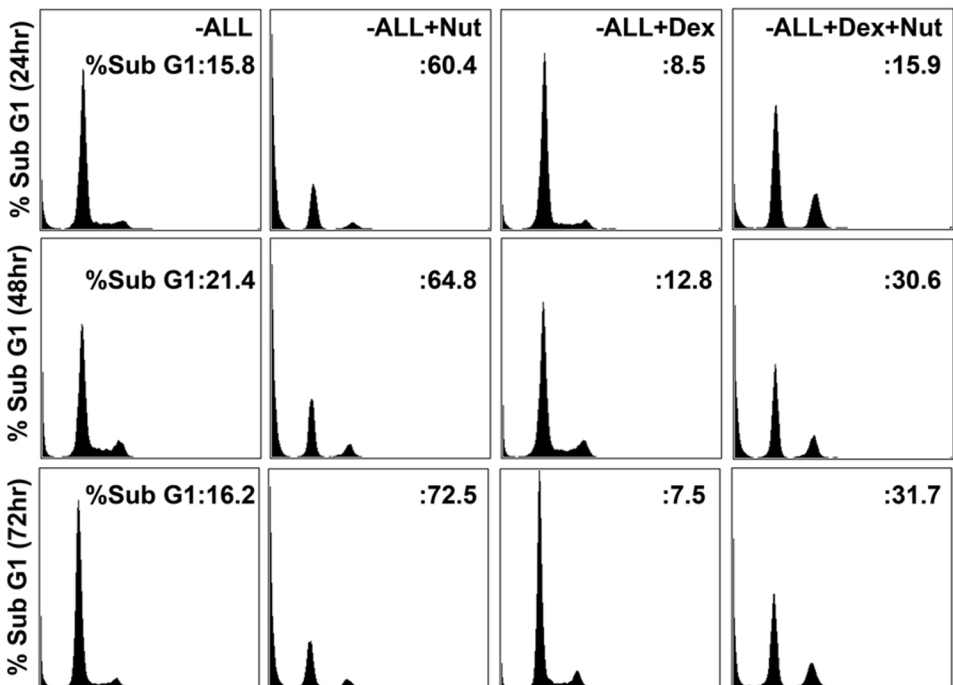

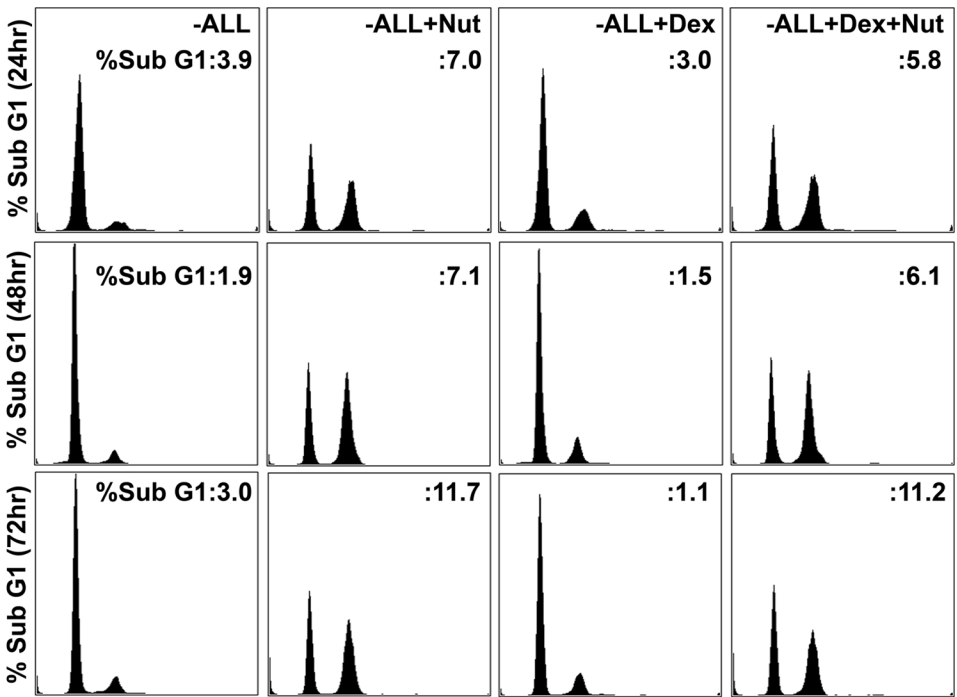

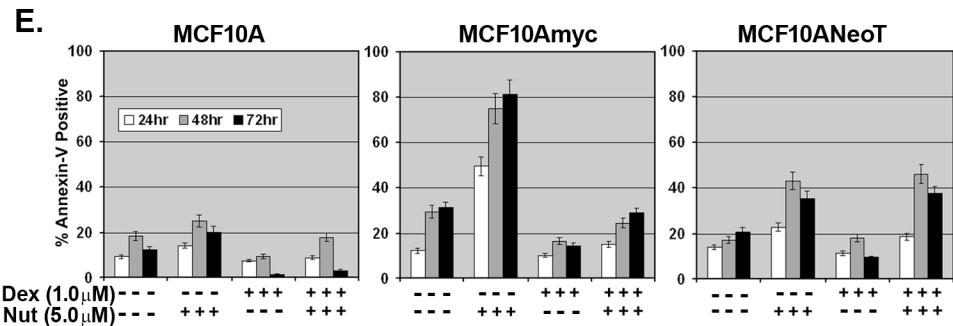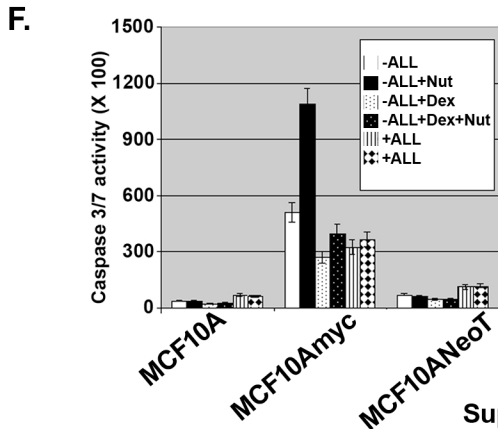

Supplement Fig. 4S-E & F

Supplement: supp_M112.393256_jbc.M112.393256-4.pdf [file supp_M112.393256_jbc.M112.393256-4.pdf]

**MCF10Amyc**

**Supplement Fig. 5S-A**

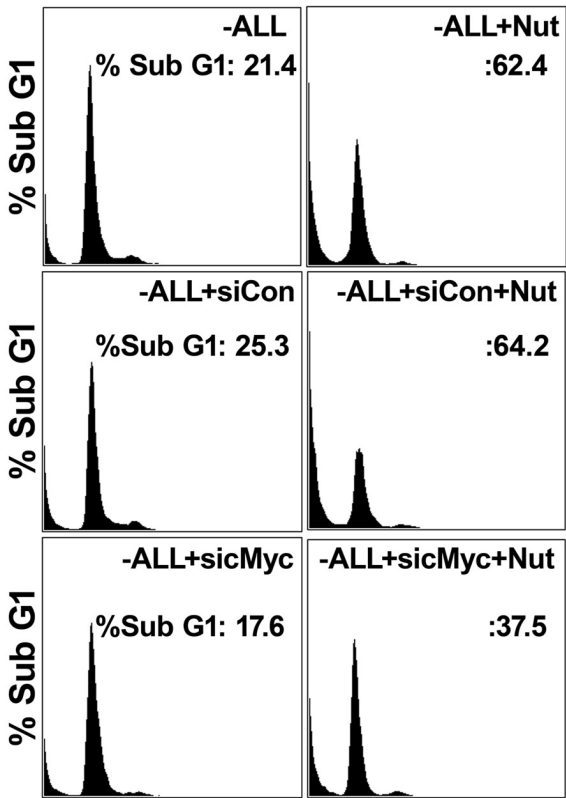

Supplement Fig. 5S-B

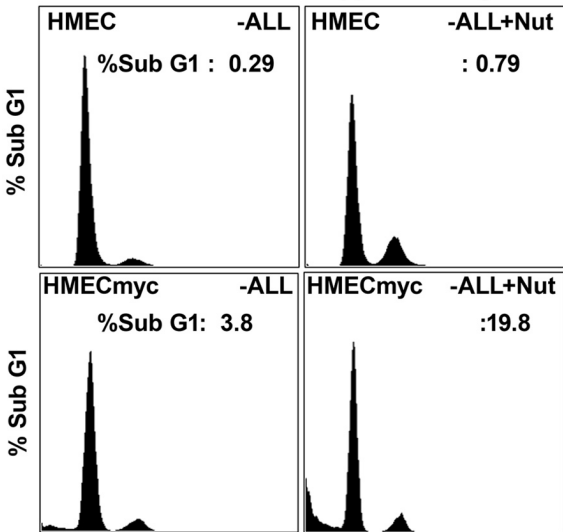

Supplement: supp_M112.393256_jbc.M112.393256-5.pdf [file supp_M112.393256_jbc.M112.393256-5.pdf]

A.

Exp# 1

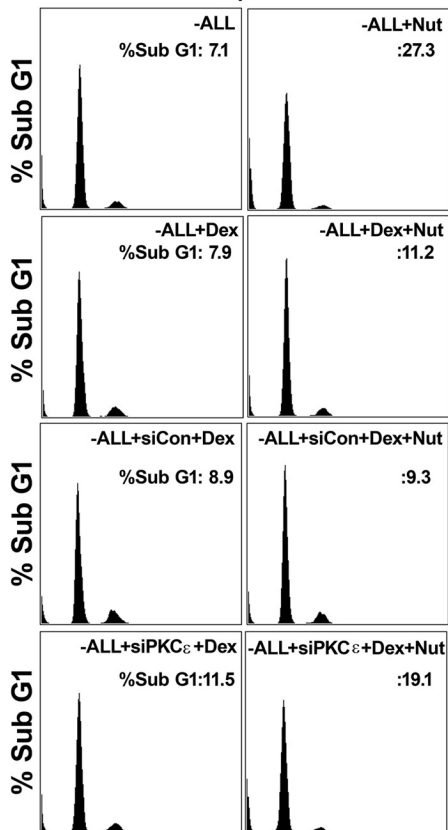

B.

Exp# 2

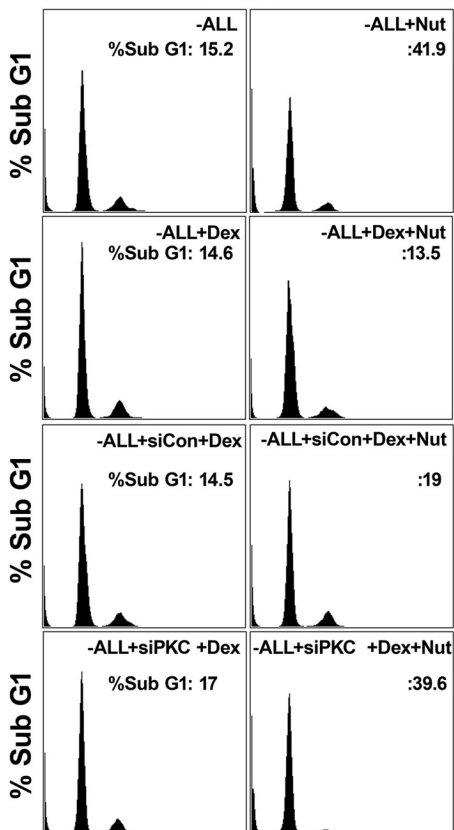

Supplement: supp_M112.393256_jbc.M112.393256-6.pdf [file supp_M112.393256_jbc.M112.393256-6.pdf]

0

5

15

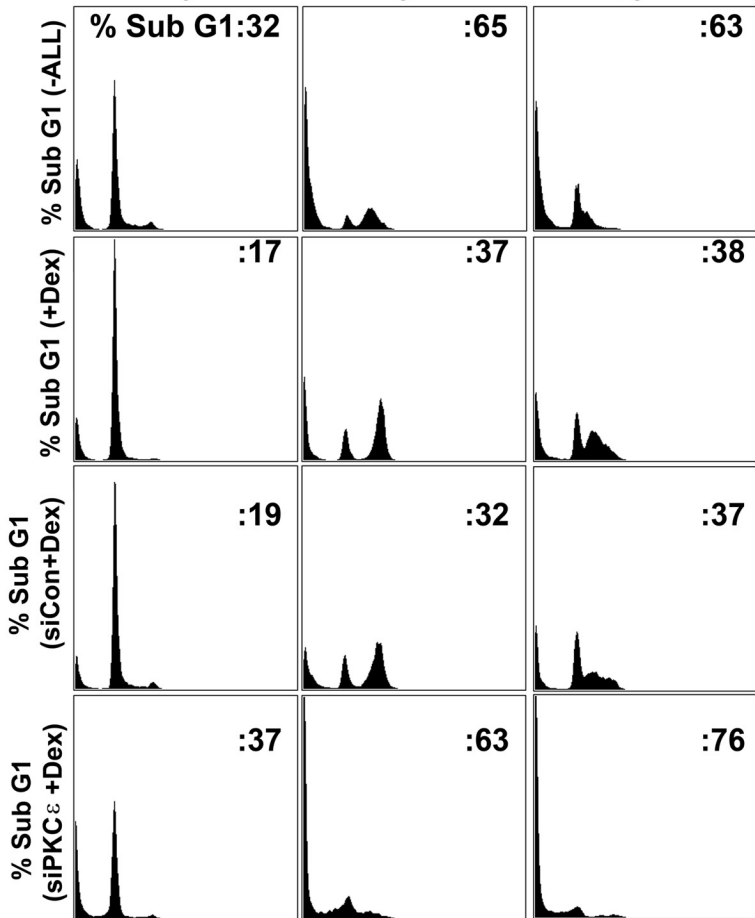

0

4

10

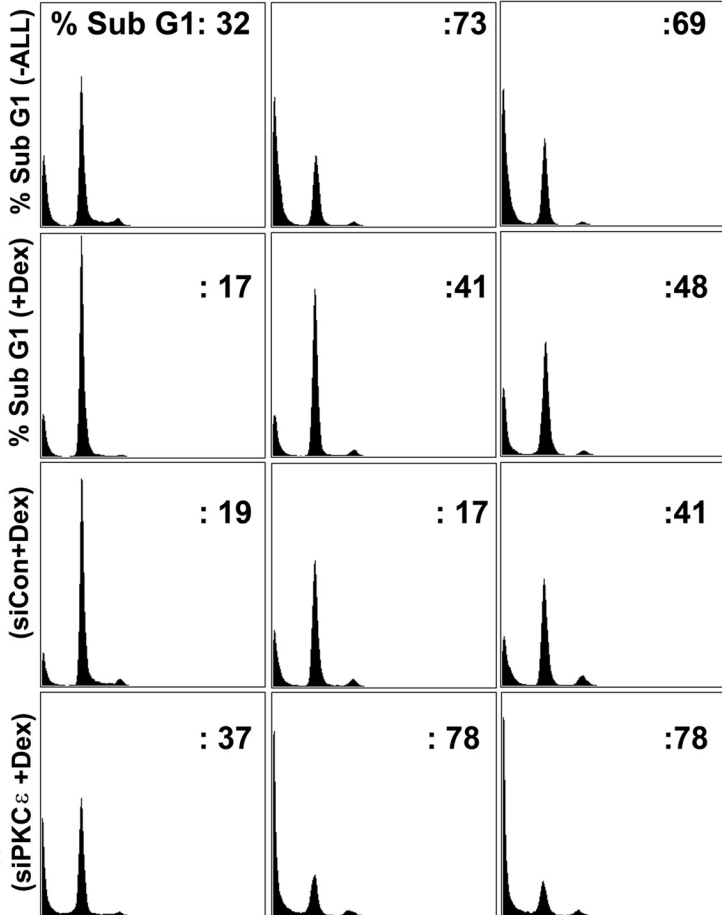

Supplement: supp_M112.393256_jbc.M112.393256-7.pdf [file supp_M112.393256_jbc.M112.393256-7.pdf]

# Supplement Fig. 8S-A

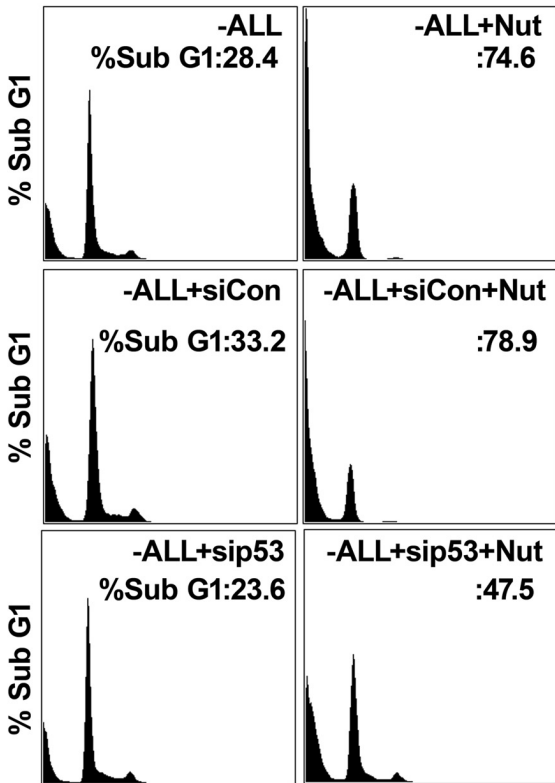

Cis ( $\mu$ M): 0

1

5

15

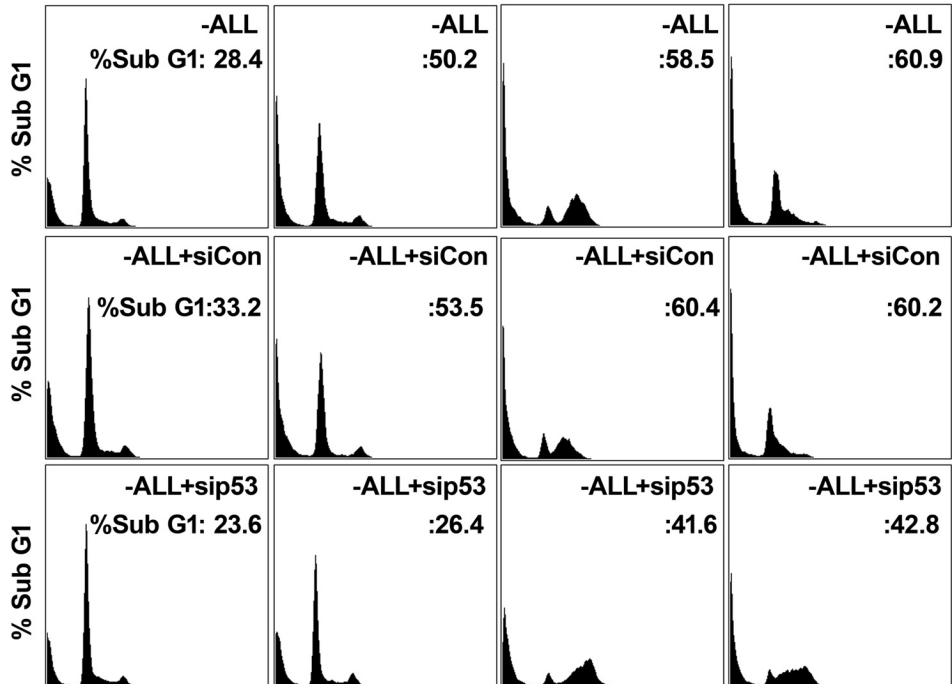

IR (Gy):

0

4

7

10

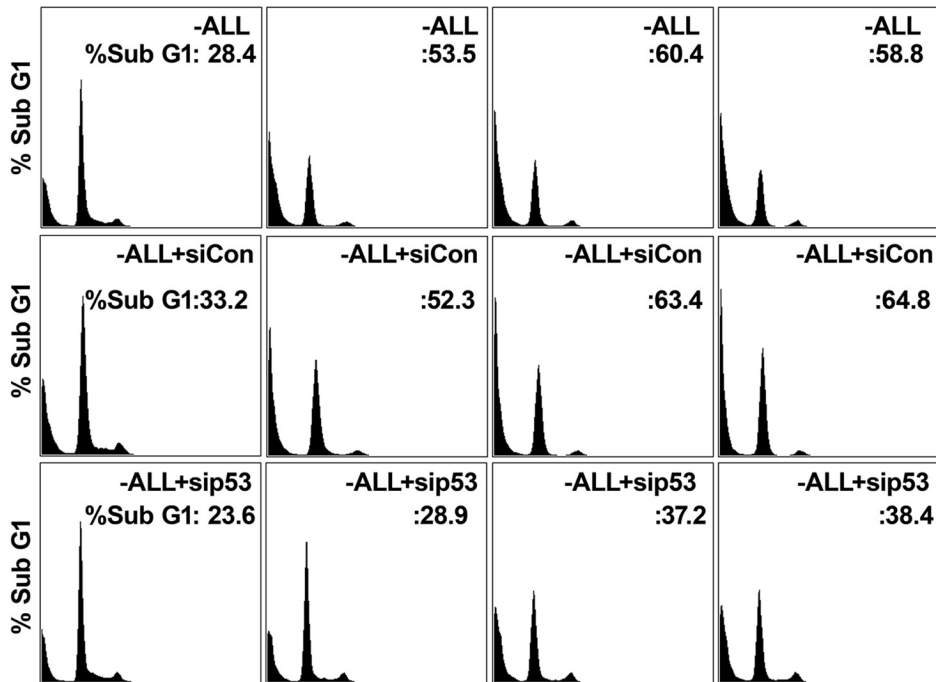

Supplement: supp_M112.393256_jbc.M112.393256-8.pdf [file supp_M112.393256_jbc.M112.393256-8.pdf]
